# Supplementary material
Source: HighWire-hosted journal article supplement (https://ard.bmj.com/content/78/1/150)
Supplement: inline-supplementary-material-2 [file inline-supplementary-material-2.docx]

Supplementary Table 2. Immune cell subset frequencies

Immune subset frequencies are provided as %: median (interquartile range).
