# Supplementary material
Source: HighWire-hosted journal article supplement (https://ard.bmj.com/content/78/1/150)
Supplement: inline-supplementary-material-3 [file inline-supplementary-material-3.docx]

Supplementary Table 3. Immune cell subset absolute cell counts

Absolute cell numbers (count x 10^3 /uL) were determined using absolute lymphocyte count values and immune subset percentages. Values are provided as: median (interquartile range).
